# Supplementary material for: Educational Disparities in COVID-19 Prevention in China: The Role of Contextual Danger, Perceived Risk, and Interventional Context
Source: MDPI journal article supplement (doi:10.3390/ijerph18073383), 2021-03-24

**Table S1.** Educational Disparities in COVID-19 Preventive Behaviors Stratified by Context Cue of Danger, Perceived Risk of Local Outbreak, and Interventional Context, The Chinese Survey of COVID-19 Impacts 2020 ( $N = 4638$ )<sup>a</sup>

| Context Cue of Danger                   | Mask Wearing <sup>b</sup>  |                               | Handwashing <sup>b</sup>   |                               | Limited Public Outing <sup>b</sup> |                               |
|-----------------------------------------|----------------------------|-------------------------------|----------------------------|-------------------------------|------------------------------------|-------------------------------|
|                                         | No<br>( $N = 3098$ )       | Yes<br>( $N = 1540$ )         | No<br>( $N = 3098$ )       | Yes<br>( $N = 1540$ )         | No<br>( $N = 3098$ )               | Yes<br>( $N = 1540$ )         |
| Intercept                               | 3.55 ***<br>(3.43,3.67)    | 3.60 ***<br>(3.46,3.73)       | 3.36 ***<br>(3.24,3.49)    | 3.11 ***<br>(2.95,3.28)       | 3.30 ***<br>(3.15,3.46)            | 3.02 ***<br>(2.77,3.27)       |
| Education <sup>c</sup><br>≤ High School | 0.04<br>(−0.02,0.11)       | 0.08 *<br>(0.02,0.15)         | 0.05<br>(−0.01,0.12)       | 0.08 *<br>(0.00,0.16)         | 0<br>(−0.08,0.08)                  | 0.18 **<br>(0.06,0.29)        |
| Associate Degree                        | 0.03<br>(−0.03,0.09)       | 0.13 ***<br>(0.07,0.19)       | 0.07 *<br>(0.01,0.14)      | 0.14 ***<br>(0.06,0.22)       | 0.04<br>(−0.04,0.13)               | 0.13 *<br>(0.02,0.24)         |
| ≥ Bachelor's Degree                     |                            |                               |                            |                               |                                    |                               |
| Perceived Risk of Local Outbreak        | Zero/Low<br>( $N = 4024$ ) | Medium/High<br>( $N = 614$ )  | Zero/Low<br>( $N = 4024$ ) | Medium/High<br>( $N = 614$ )  | Zero/Low<br>( $N = 4024$ )         | Medium/High<br>( $N = 614$ )  |
| Intercept                               | 3.55 ***<br>(3.44,3.66)    | 3.43 ***<br>(3.20,3.65)       | 3.31 ***<br>(3.19,3.42)    | 3.14 ***<br>(2.84,3.44)       | 3.18 ***<br>(3.03,3.33)            | 3.16 ***<br>(2.74,3.59)       |
| Education <sup>d</sup><br>≤ High School | 0.04<br>(−0.02,0.09)       | 0.21 ***<br>(0.10,0.32)       | 0.05<br>(−0.00,0.11)       | 0.12<br>(−0.03,0.28)          | 0.02<br>(−0.05,0.10)               | 0.32 **<br>(0.12,0.53)        |
| Associate Degree                        | 0.04<br>(−0.01,0.09)       | 0.21 ***<br>(0.10,0.31)       | 0.09 ***<br>(0.04,0.15)    | 0.16 *<br>(0.02,0.30)         | 0.03<br>(−0.04,0.11)               | 0.36 ***<br>(0.16,0.55)       |
| ≥ Bachelor's Degree                     |                            |                               |                            |                               |                                    |                               |
| Interventional Context                  | Wuhan<br>( $N = 1379$ )    | Other Areas<br>( $N = 3259$ ) | Wuhan<br>( $N = 1379$ )    | Other Areas<br>( $N = 3259$ ) | Wuhan<br>( $N = 1379$ )            | Other Areas<br>( $N = 3259$ ) |
| Intercept                               | 3.69 ***<br>(3.57,3.82)    | 3.53 ***<br>(3.41,3.65)       | 3.21 ***<br>(3.05,3.38)    | 3.34 ***<br>(3.21,3.46)       | 3.20 ***<br>(2.95,3.44)            | 3.25 ***<br>(3.09,3.41)       |
| Education <sup>e</sup><br>≤ High School | 0.03<br>(−0.02,0.09)       | 0.07 *<br>(0.00,0.13)         | 0.08<br>(0.00,0.16)        | 0.05<br>(−0.01,0.12)          | 0.08<br>(−0.04,0.19)               | 0.05<br>(−0.03,0.14)          |
| Associate Degree                        | 0.02<br>(−0.04,0.07)       | 0.08 *<br>(0.02,0.14)         | 0.07<br>(−0.01,0.15)       | 0.11 ***<br>(0.05,0.18)       | 0.04<br>(−0.07,0.16)               | 0.08 *<br>(0.00,0.17)         |
| ≥ Bachelor's Degree                     |                            |                               |                            |                               |                                    |                               |

<sup>a</sup> Fifteen cases with missing data on outcomes were excluded. <sup>b</sup> All models adjusted for sex, age, urbanicity, income, occupation, subjective social ranking, and individual coronavirus exposure. <sup>c</sup> Models additionally adjusted for perceived risk of outbreak and interventional context. <sup>d</sup> Models additionally adjusted for context cue of danger and interventional context. <sup>e</sup> Models additionally adjusted for context cue of danger and perceived risk of outbreak. 95% confidence intervals in brackets. \*  $p < 0.05$ , \*\*  $p < 0.01$ , \*\*\*  $p < 0.001$ .

Figure S1. Confirmed COVID-19 Cases By Province By the Time of Survey

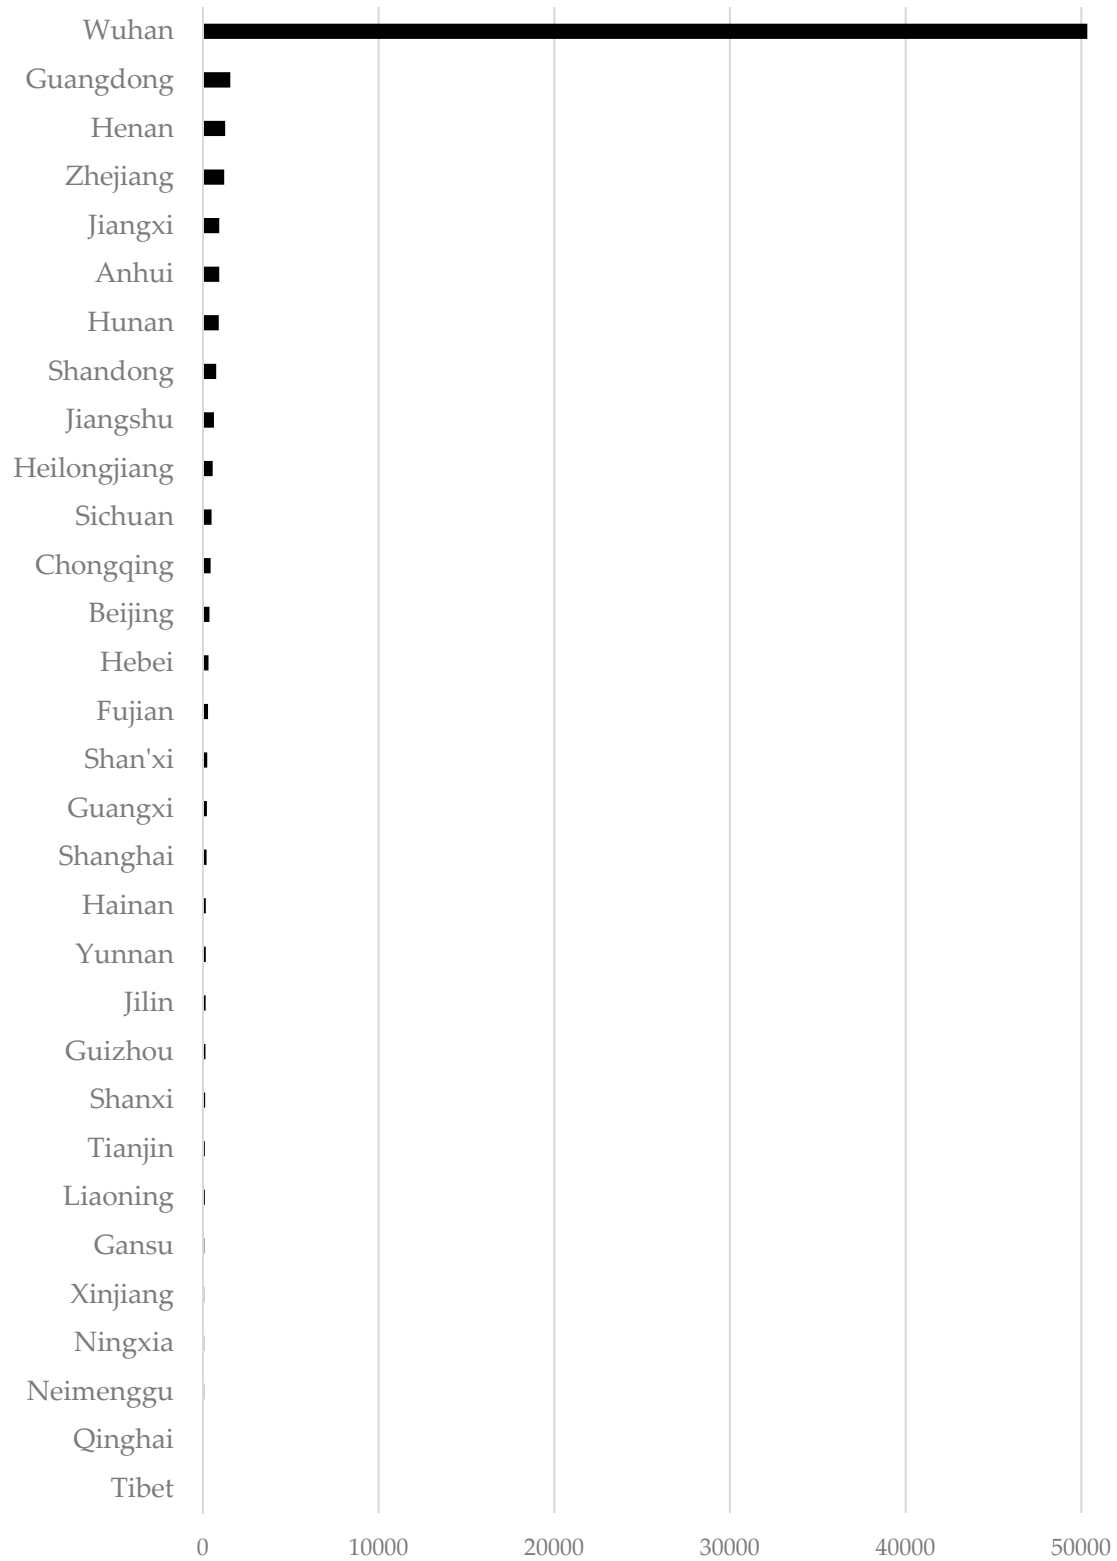

Supplement: s1 [file s1]
